# Supplementary material for: Identification and analysis of mitochondria-related key genes of heart failure
Source: J Transl Med. 2022 Sep 7;20:410. doi: 10.1186/s12967-022-03605-2 (PMC9450345; doi:10.1186/s12967-022-03605-2)
Supplement: Supplementary file 2 — Additional file 2: Table S2. Volcano plot downregulated gene dataset. [file 12967_2022_3605_MOESM2_ESM.xls]

gene	logFC	AveExpr	t	P.Value	adj.P.Val	B
SERPINA3	-2.63908668457129	7.05932647284345	-24.4599836526225	8.46688490843738e-75	1.71488286935491e-70	159.550874692733
TUBA3D	-0.994593921859424	7.32981224920128	-23.1311751055258	6.99954830013681e-70	7.08844256354855e-66	148.354489850482
HMOX2	-0.668352169865406	8.55727388178914	-22.8606284637182	7.17289615251494e-69	4.84266128910125e-65	146.052433744898
FCN3	-1.78689579411765	8.00934878594249	-21.0517677561036	4.84580798268268e-62	1.63578324802092e-58	130.487966553488
FURIN	-0.603445689307075	6.8515578913738	-18.9751012550241	4.45285784465469e-54	9.01881827856362e-51	112.326583594975
LAD1	-0.669342834538051	5.53158390095847	-18.9630732731851	4.9547582357781e-54	9.12306120976815e-51	112.220765733167
LCN6	-0.917414348080756	5.6332181341853	-18.5771020371523	1.52921802533119e-52	2.38252168346599e-49	108.822632627152
GGT5	-0.830097425307414	6.91341828115016	-18.4958566906726	3.14929721654502e-52	4.55613327313591e-49	108.106794650897
S1PR3	-0.627092349867065	6.34105491373802	-18.4453102076001	4.93675312194772e-52	6.6659331821286e-49	107.661357096538
SLCO4A1	-0.749986143174643	5.53598988977636	-18.205877287868	4.15442279594764e-51	4.67464885050686e-48	105.55062684293
CSDC2	-0.828482967181792	8.65143980830671	-17.4429360282987	3.69799764027184e-48	3.40451110027572e-45	98.8202433918235
IL1RL1	-1.75892138472084	5.83797536421725	-17.0974366376889	8.00737705117337e-47	5.79219338551663e-44	95.7724626013707
GPR4	-0.72103050232636	5.98493526517572	-17.0628748324243	1.08906026526337e-46	7.60614710780836e-44	95.4676571353032
TUBA3E	-0.857905209413426	4.57848154632588	-17.0419348051762	1.31210589369396e-46	8.57270734544433e-44	95.2829933213754
CD163	-1.52003975718677	7.42486541214058	-16.6763282838036	3.38921826107408e-45	1.80645333315249e-42	92.0602637986822
NPTX2	-0.856335404536386	5.62983344728435	-16.6123931719686	5.9825797038938e-45	3.02927923306663e-42	91.4970401804523
BCL6	-0.718761577309732	8.24022119169329	-16.1526830605683	3.5438875971546e-43	1.56038911723411e-40	87.4515814070897
SEMA4B	-0.676457269732463	5.99041786900959	-16.1272845776848	4.43915440243339e-43	1.91299219716779e-40	87.2283322734648
USP31	-0.574032328389828	8.8237575942492	-16.0418534796113	9.46739629620033e-43	3.68755085737003e-40	86.4776356155971
ALG3	-0.508655518610832	7.68665671246006	-16.0143880678596	1.2076603201864e-42	4.61508530661422e-40	86.2363709008481
VSIG4	-1.29918502471751	7.11963646964856	-16.002955251984	1.33642502374534e-42	4.92144589653421e-40	86.1359530545518
PHYHD1	-0.550158741816216	7.17923987539936	-15.5878651179326	5.26275498211477e-41	1.63987445242696e-38	82.4952032308331
STAT3	-0.603743583457954	10.4023247571885	-15.5441043556737	7.74667416319344e-41	2.30736968384294e-38	82.1120186951607
LCN10	-0.584463880151213	5.97180291054313	-15.4900845844898	1.24824121966163e-40	3.66404024101835e-38	81.6391889718453
ADAMTS9	-1.17178591201395	8.12717081469649	-15.3848080362609	3.16083261909478e-40	8.65128430637103e-38	80.7183280504323
RNASE2	-1.16406066612662	4.23124229392971	-15.362468640058	3.84925718303977e-40	1.03950473313717e-37	80.5230318149153
AQP3	-0.96064075980392	6.46911968051118	-15.2539544267166	1.00188755518403e-39	2.56863677755662e-37	79.57493571394
TMTC1	-0.567316270646387	8.48097538977636	-15.2397828118502	1.13512561759073e-39	2.87385428233534e-37	79.4511877280507
FAM46B	-0.796838482593873	6.24955725239617	-15.1306933301074	2.9662566146432e-39	7.23838090035945e-37	78.4991733090561
NT5DC2	-0.604283035227652	8.32365101597444	-15.1205538858458	3.2430978995446e-39	7.72772998322074e-37	78.4107392871442
ST6GALNAC3	-0.643510055957129	6.21841516932907	-15.0971982683041	3.98296602849169e-39	9.38034813268264e-37	78.2070711393937
C1QTNF1	-0.994155020521764	8.42847126198083	-14.946800408611	1.49415212749822e-38	3.40028732475831e-36	76.8967410014459
C15orf59	-0.721791853024261	7.36622609265176	-14.8754245849379	2.79621621729785e-38	6.0249535388458e-36	76.2756304487877
ATP1A1	-0.518836887919566	10.6561560351438	-14.7660028918362	7.30134649796938e-38	1.52455125742136e-35	75.3244259211889
MYH6	-1.57927619765702	10.1209518051118	-14.7120774363953	1.17120310680588e-37	2.42056609441288e-35	74.8561028172821
LYVE1	-1.43473123624959	9.10380694249201	-14.7028881124608	1.26938028213885e-37	2.59697254893336e-35	74.7763273491751
NID1	-0.596934333208704	8.87905988498403	-14.6521848224699	1.97886206765669e-37	4.00798723183185e-35	74.3363180798395
TEAD4	-0.653871870555002	5.80794903194888	-14.5872870975775	3.49176151036196e-37	6.85764577737164e-35	73.7735357204179
WNK3	-0.717840763584245	3.73584776038339	-14.5762444357211	3.84582652553344e-37	7.34843117435418e-35	73.6778219846248
DUSP13	-0.633903103938182	5.43153481789137	-14.5177357119008	6.41407300307344e-37	1.15991638039508e-34	73.1709192412583
ECRP	-0.85002515150382	4.4093784313099	-14.4640623873437	1.02510998444339e-36	1.78987738145831e-34	72.706254119016
LPCAT3	-0.597774207253238	9.16066846964856	-14.0669933957847	3.25480089999885e-35	4.70876695918405e-33	69.2796888917077
KCND3	-0.507836276669988	6.88120487220447	-14.0622410428282	3.39191467486462e-35	4.87232906558213e-33	69.2388017827048
PLA2G2A	-1.890453726778	7.98553217571885	-13.9683598308529	7.6592068092057e-35	1.08482220079477e-32	68.4317287121323
PLP2	-0.623786268195419	9.06263820766773	-13.8765913501772	1.69607552417046e-34	2.27498766003632e-32	67.6440202209264
SLC36A4	-0.633339664340308	5.91246439616613	-13.8543165811191	2.05669936796481e-34	2.72263980384048e-32	67.4530050319868
C11orf52	-0.57252572382851	5.04788103514377	-13.8532102382699	2.07648349366412e-34	2.73098030393981e-32	67.4435195877047
MAP3K6	-0.520630205591549	7.55667456230032	-13.5836831146907	2.127380834081e-33	2.4621697950558e-31	65.1382016169561
ADAMTS4	-1.19128993124792	5.98553190734824	-13.5440832892725	2.99158570427742e-33	3.40402117159746e-31	64.8004564314913
C1orf162	-0.868000311191427	7.01353288817891	-13.4738964443157	5.47074358395108e-33	5.9253711523714e-31	64.2024654947851
KIAA0040	-0.608022628489528	6.83812983067093	-13.4326243856114	7.79887155789992e-33	8.10042792480539e-31	63.8512101225649
STEAP3	-0.525471836282821	5.61158080511182	-13.2847565368248	2.77140462048693e-32	2.67295377063534e-30	62.5951336123993
MID1IP1	-0.617136351944174	6.78727082108626	-13.2332928008745	4.30495469139643e-32	4.07441833268893e-30	62.1588680232589
CHAC2	-0.556339113077436	4.63188697124601	-13.1804510077729	6.76311180373127e-32	6.19819305306666e-30	61.711415339793
NAMPT	-0.571893146581091	10.1663076405751	-13.0907407713512	1.45444848302305e-31	1.30346900774995e-29	60.9529397719243
GNMT	-0.675732448363244	4.20819384025559	-13.0635814731366	1.83336887509777e-31	1.61448057374914e-29	60.7236109214046
EDNRB	-0.692299754569623	8.01506660063898	-13.0630313194463	1.84198489686272e-31	1.61504597840076e-29	60.718966946309
ETNK2	-0.770033630649715	5.0483282971246	-12.8792634663715	8.79112913568811e-31	6.95529412164949e-29	59.1709980694827
IL18R1	-0.638429624459952	4.44780675399361	-12.8583362095906	1.04993077212022e-30	8.21053971371539e-29	58.9951376199213
OSMR	-0.724589356347622	8.16191655910543	-12.827647899206	1.36200149962183e-30	1.04492342323259e-28	58.7374099361347
KPNA2	-0.522425795758558	8.04219971246006	-12.7942906130835	1.80688708133746e-30	1.36047178235721e-28	58.4574836943245
MYOT	-1.07218998001827	7.15922952076677	-12.7644697925747	2.32588367238534e-30	1.71303446910883e-28	58.2074269072178
MAP2K1	-0.54150502513293	7.72786424600639	-12.7372423258082	2.92846601455978e-30	2.11078827967593e-28	57.9792760787359
ANPEP	-0.991872508433032	5.51261931309904	-12.6392457845875	6.70188448325367e-30	4.60135485843457e-28	57.1594018430861
ALOX5AP	-0.970363140121307	7.27484380191693	-12.5852277082781	1.05686585220341e-29	7.06460758103227e-28	56.7083390992278
METTL7B	-1.07524055279993	7.31062734824281	-12.5840219100656	1.06765914114182e-29	7.11327902785735e-28	56.6982775904646
SLC2A1	-0.643351598786966	8.55751368051118	-12.5405223692997	1.54004600082558e-29	1.00619650647488e-27	56.3355168476843
ADORA3	-0.760575600116321	4.89407024600639	-12.4228145572326	4.14150481737734e-29	2.56519995630461e-27	55.3559945228613
SIGLEC9	-0.597293546485544	4.83311650159744	-12.419774985977	4.24849185358905e-29	2.61546972652257e-27	55.330741360176
CCT2	-0.524031275589897	7.48240272204473	-12.3513504700606	7.53954304705781e-29	4.54481859747348e-27	54.7628177031745
PLIN2	-0.831374879611164	7.9563729456869	-12.2249832729016	2.16862709711734e-28	1.24428819334319e-26	53.7168192625276
SLC11A1	-0.835395306497172	5.15512220766773	-12.1428430066073	4.30097932571527e-28	2.42651908810688e-26	53.038938026523
S100A9	-0.749156319292114	6.27723126517572	-12.1323303974996	4.69436747636393e-28	2.63378722621261e-26	52.9522980113722
FCER1G	-0.987173292414418	6.79876352076677	-12.1272346795874	4.89775638056069e-28	2.73275916616739e-26	52.910311173618
MPP3	-0.653595092971086	7.72678438658147	-12.0607887886272	8.51015566624376e-28	4.60868162738238e-26	52.3634046826617
POR	-0.514962735003325	7.11383801916933	-12.0312072958015	1.08794710996695e-27	5.81405824941174e-26	52.1202751669013
FCGBP	-0.600816436565306	4.35839004472843	-12.0177116899135	1.21686280472174e-27	6.41831751219638e-26	52.0094277261014
CNN1	-0.950795728065795	9.04778191054313	-11.9338661843144	2.43754894473503e-27	1.24357975633913e-25	51.32178464221
IFITM2	-0.514091722873051	8.3383338370607	-11.8840458849736	3.68013791191746e-27	1.84498795217763e-25	50.9140435129892
FKBP5	-0.971478199277163	9.2287045942492	-11.8200070218202	6.24353567391208e-27	3.09184771490013e-25	50.3908809148508
PVR	-0.586182683657355	8.00371603833866	-11.7945294366531	7.70255096301382e-27	3.7774205134354e-25	50.1830424024584
HOPX	-0.658398781987366	5.2444357028754	-11.7104592642404	1.5383756130952e-26	7.22929458645713e-25	49.4984494848328
ADAMTS15	-0.593985816218012	6.05335822044728	-11.6858432843322	1.88310493269029e-26	8.70785554947699e-25	49.2983588944856
RGAG1	-0.508118634513131	4.5814108913738	-11.6591418625129	2.34447881696433e-26	1.06948364772062e-24	49.08150326149
AOX1	-1.17021532282319	5.34319604153355	-11.6426590164276	2.68382655192421e-26	1.21065084593926e-24	48.9477351755802
ANKRD2	-1.09336983229478	9.21719768051118	-11.6035356925544	3.6980667726215e-26	1.65343585899947e-24	48.6305257047267
CYP4B1	-1.27463335505982	6.99902067412141	-11.5828347434573	4.38092411061912e-26	1.94586045913333e-24	48.4628552429102
C1orf105	-0.868015362495846	4.83995028115016	-11.5153374171346	7.60606173938923e-26	3.32728238595226e-24	47.9169833477566
CYP4Z1	-0.629929742480889	3.77436734504792	-11.514150881012	7.68009808634957e-26	3.35242902243371e-24	47.9073989422649
GATSL1	-0.556062861540376	7.8233290798722	-11.4000744203822	1.94548285841374e-25	8.10873934450154e-24	46.9878098627704
ZDHHC9	-0.560552903248579	8.00769389456869	-11.4000598669262	1.9457131042894e-25	8.10873934450154e-24	46.9876927843534
ALOX5	-0.703770708873381	6.09508438977636	-11.3855586400533	2.18915505535445e-25	9.06731012088936e-24	46.8710651836548
TXNRD1	-0.570001432494186	7.76640217891374	-11.331291072202	3.40125409888604e-25	1.37502995047581e-23	46.4351589217245
LAPTM5	-0.874601157028917	7.94034720766773	-11.3230362725307	3.63676585580562e-25	1.46439474440332e-23	46.3689279168585
FPR1	-0.657141152916248	4.90866065814696	-11.2019081767935	9.69105689533158e-25	3.73871745443897e-23	45.3994163399543
ITGA5	-0.728551246718174	8.40059960702875	-11.1686100810439	1.26780364672404e-24	4.85408224210752e-23	45.1336747608785
KBTBD10	-0.69040594508142	8.85325014376997	-11.1168477556615	1.9237356951058e-24	7.20209663006894e-23	44.7212515868729
P2RY2	-0.524947061648386	6.89937051118211	-11.0945695922746	2.3013245737623e-24	8.52121168500578e-23	44.5440024845164
TCN2	-0.51115650976238	6.57471908306709	-11.0645832207345	2.92843753144891e-24	1.07450314786171e-22	44.3056697301326
TUBA1C	-0.727889863077436	6.9894075942492	-11.0497125678035	3.29983892134645e-24	1.19775873679124e-22	44.1875817190864
RARRES1	-0.961353762628779	5.47019798083067	-11.0430836764486	3.48016128715756e-24	1.25422040409412e-22	44.1349640278204
BLM	-0.635383678423064	5.71460747923323	-11.0274410571113	3.94550067617804e-24	1.41187580733763e-22	44.0108536092593
ATP1B3	-0.740663489739119	6.82316326517572	-11.0237933767741	4.06262556690078e-24	1.45122430744283e-22	43.9819235884657
CRISPLD2	-0.619946194416753	7.34231645686901	-11.0155252804306	4.34107688599193e-24	1.5425293201558e-22	43.9163642992768
TIMP4	-0.750153293577593	8.46011822364217	-10.9916634068005	5.25576533301259e-24	1.84809498359092e-22	43.7272806598633
CD38	-0.610154060319045	6.22284318530351	-10.9077428221022	1.02815572024425e-23	3.47650516825158e-22	43.0637335622149
IL1R2	-0.937466719092717	5.3265164600639	-10.8619453135046	1.4814441269188e-23	4.86307444839764e-22	42.7025807937373
JPH1	-0.55079745609006	7.54316181789137	-10.8324339610748	1.87390239826907e-23	6.07264306792668e-22	42.4702220299096
SLC7A1	-0.724059202185111	6.96641142492013	-10.7910547542545	2.60402865321378e-23	8.30582619562076e-22	42.1449052263156
CPAMD8	-0.519173871261219	5.88734823003195	-10.7893663929717	2.6391932581853e-23	8.40475161183729e-22	42.1316436543581
CHDH	-0.626273412761713	5.04399168051118	-10.7537038293269	3.50287527984378e-23	1.10166515400553e-21	41.8517470288635
MTHFD2	-0.546640202351279	7.59256116613419	-10.618937242428	1.01719475286817e-22	3.02085960771143e-21	40.7979119345561
SERPINB8	-0.736213261507144	5.85801786261981	-10.6184531140168	1.02108647322725e-22	3.02797736877668e-21	40.7941373767385
SULT1B1	-0.580919887919574	3.80902339616613	-10.6179478704483	1.02516372196563e-22	3.03562368782045e-21	40.7901982785739
GRB14	-0.521509765412095	5.85632461661342	-10.5566472630725	1.66149078138692e-22	4.83503366181189e-21	40.3129281782252
GPR133	-0.539562986997335	7.94595970926518	-10.5107457068615	2.38318379842423e-22	6.77935458613544e-21	39.9564093449889
GFPT2	-0.876728754278825	6.49062612779553	-10.487171567754	2.86742385210533e-22	8.05503504861877e-21	39.7735965316602
SLCO2A1	-0.765768626121636	7.64278662939297	-10.4861231783534	2.89109642725361e-22	8.11028629329566e-21	39.7654710432621
ARRDC4	-0.649449307535721	7.29401519808307	-10.3841227096186	6.42190568363438e-22	1.72049309148586e-20	38.9767965447394
MT1X	-0.810975138999655	9.1760534600639	-10.3677200857751	7.29880452471473e-22	1.94257538559228e-20	38.8503195791385
CEBPB	-0.574100106098369	8.10436903833866	-10.3456511785439	8.66915232527851e-22	2.28924395301422e-20	38.6803052817842
MIR208A	-1.1886883775756	4.82529407348243	-10.2511637819555	1.80737946195697e-21	4.60461177641214e-20	37.954410786869
CCR1	-0.738613717098705	4.82451411501597	-10.216263674195	2.36890035533866e-21	5.93808264814719e-20	37.6871278334781
BBS12	-0.506665217887997	4.99722957827476	-10.1778798702774	3.18822153290288e-21	7.83667948148239e-20	37.3936910534879
BCL3	-0.580886656031907	6.73382096805112	-10.17683893867	3.21398321649721e-21	7.89042618993145e-20	37.3857410450394
SH3PXD2B	-0.608422213526087	6.64144312460064	-10.165685029075	3.50335315276921e-21	8.56967569519174e-20	37.3005798527857
SHISA3	-0.883842619682619	6.40244615335463	-10.1610512454392	3.63105015788064e-21	8.86063733707404e-20	37.2652142709583
MGST1	-1.14014585331505	7.20084766773163	-10.0761845874798	6.9852379608022e-21	1.64510476346614e-19	36.6189452311826
PLTP	-0.747211546443999	8.6834140543131	-10.0136895013528	1.12894573628153e-20	2.59542190041386e-19	36.14480542412
GPSM2	-0.640750516658358	4.74699939616613	-9.92188791915515	2.27907890617717e-20	5.03385650662077e-19	35.4510822877156
SGPP2	-0.984918251620139	6.28410963258786	-9.88417021803058	3.03876404189367e-20	6.59669098655031e-19	35.1670220616925
CBS	-0.527114799476563	5.93345614376997	-9.80875743603848	5.39226463606849e-20	1.13293493712584e-18	34.600776781883
TIMP1	-0.809677962362912	9.95654268370607	-9.77864954616053	6.77546483534962e-20	1.3946165119428e-18	34.3753489075874
GALNTL2	-0.898809015702891	6.13929670607029	-9.65190173067297	1.7647501566885e-19	3.45679397229873e-18	33.4304124094313
PI15	-0.980523481763042	3.75597653035144	-9.59101822449151	2.78854905660387e-19	5.34335596901181e-18	32.9788791412226
C13orf33	-0.833411679544701	6.86682708626198	-9.57416633331022	3.16415581170991e-19	6.01754101505844e-18	32.8541746584696
SAT1	-0.512240159106021	9.13026145367412	-9.50075283821227	5.47945591128854e-19	1.01724014690411e-17	32.3123166257375
CTSC	-0.774363376620138	7.34852253035144	-9.48969985150646	5.95055873026049e-19	1.09865648607745e-17	32.2309345912142
CD14	-0.808819963193744	8.07105461341853	-9.45930484279593	7.46356377689418e-19	1.36186505168662e-17	32.0074095891346
SERPINE1	-1.49733917152708	6.96835317571885	-9.40519466371224	1.1160422910303e-18	1.99178660061268e-17	31.6104702198892
P2RX5	-0.663269679877034	6.4801818658147	-9.31531188423561	2.17136148158124e-18	3.73651278232339e-17	30.9539346056222
MT1A	-0.864138774800596	7.85883786261981	-9.28777685953706	2.66059152280783e-18	4.51698413268649e-17	30.7535214310248
SLC22A5	-0.507347183615819	7.10036309904153	-9.28306480326089	2.75464330472796e-18	4.6649285530067e-17	30.719258537127
STEAP4	-0.582882473288468	8.36271311501597	-9.24936836323292	3.53047189218314e-18	5.89984964556743e-17	30.4745290943322
PNP	-0.686650505068124	5.98996841533546	-9.18299452469537	5.74745135766405e-18	9.3802481706791e-17	29.9939600781353
F13A1	-0.78582455637255	9.10148686900958	-9.17776795850124	5.97179754036302e-18	9.70728630678271e-17	29.956202368993
POGLUT1	-0.537057022723499	5.34631643769968	-9.17578117103175	6.05933845236517e-18	9.84168733073008e-17	29.9418526839277
TLR2	-0.676459033607512	5.15673590095847	-9.14048148862129	7.84493532666783e-18	1.25308612071238e-16	29.6871975577441
SLC7A8	-0.550057819707537	7.67506438019169	-9.1219162075694	8.98428244863544e-18	1.42496207294175e-16	29.5534937033891
CHRDL2	-0.812249203389833	4.96929696805112	-9.04902927755873	1.52774209336628e-17	2.34949797714811e-16	29.0301043139345
IL1R1	-0.601812877450979	7.51508524600639	-9.0438239188093	1.58663319157905e-17	2.43267741576398e-16	28.9928192453324
C1QB	-0.707716493353271	7.93373433226837	-8.97954777712194	2.52854409210731e-17	3.80201425698155e-16	28.5334592395542
ELL2	-0.514363859878695	7.79592919488818	-8.94506109727574	3.24432404314105e-17	4.81043478548893e-16	28.2877913400338
SCGN	-0.597297121427383	3.61657430351438	-8.943239036013	3.28728275233484e-17	4.87054296535291e-16	28.274827344093
IFI30	-0.709946712778328	7.49750434504792	-8.84294070715993	6.76515267231141e-17	9.58862156927888e-16	27.5636313965669
XRCC4	-0.606827349451643	6.46230330670927	-8.81722933333139	8.13390480925681e-17	1.14167781016415e-15	27.3820906528499
S100A8	-1.00904145255899	6.97473940894569	-8.79740256765509	9.37375469531995e-17	1.30664850377846e-15	27.2423167975631
AREG	-1.13437438642406	6.20388220607029	-8.79447383811297	9.57212134695676e-17	1.33246560660661e-15	27.2216860548291
PGA4	-0.504326516242933	4.62044314696486	-8.79239673312959	9.71532160997533e-17	1.35054306031874e-15	27.207056892908
PIM1	-0.548425464772346	7.1973343514377	-8.78754684651378	1.0058000134435e-16	1.394181837436e-15	27.1729070050115
CD53	-0.685840318835165	7.38407225559105	-8.77198806157805	1.12402185521307e-16	1.54870330989698e-15	27.0634285903168
NQO1	-0.530589096709862	6.22230899680511	-8.68645678631648	2.06631807079318e-16	2.75518144870606e-15	26.4636987832375
CDKN1A	-0.563182288924892	6.36500131309904	-8.54811216724885	5.4909653202944e-16	7.02108659073502e-15	25.5012930547786
LMCD1	-0.738596941134926	7.14518137380192	-8.48072851980715	8.80869942400517e-16	1.10539899711153e-14	25.0360075825102
FAM83B	-0.668039303132267	4.15834574760383	-8.45296840080416	1.06952219045121e-15	1.33059597330459e-14	24.8449936397335
ARG2	-0.738248859255563	5.06907524920128	-8.43402950587402	1.22065039467949e-15	1.50934390072273e-14	24.7149032450325
CHL1	-0.643083341683284	5.55766434185304	-8.39766813809911	1.57245927428714e-15	1.91743468641852e-14	24.4656543019743
AGXT2L1	-0.721935542082083	5.18271115335463	-8.35036302358598	2.18392596460958e-15	2.62511789241558e-14	24.142408816125
C1QC	-0.601471390495186	7.67755739936102	-8.21758976634791	5.45756765642342e-15	6.28768915319682e-14	23.2413761186933
RAB15	-0.564634803339985	6.67232568051118	-8.1533380454682	8.47357095649909e-15	9.6040126554523e-14	22.8086903559646
MRC1	-0.629746044699235	7.6279811884984	-8.0356808576962	1.88587433229371e-14	2.038233656685e-13	22.0221026988957
HAS2	-0.773303985792619	5.46771172843451	-8.00708177642121	2.28815899615553e-14	2.44690455692366e-13	21.8320401296526
CA14	-0.513364639124292	5.29205088178914	-7.78215778954978	1.03095788170139e-13	1.02107681838533e-12	20.3530019570477
CPM	-0.703055642613829	7.38978661661342	-7.76283151941291	1.17180173718513e-13	1.15156100848849e-12	20.2272393022418
LOH3CR2A	-0.699961453015947	4.80570657188498	-7.73013888964776	1.45454122765849e-13	1.41431963634158e-12	20.0149797350095
CD68	-0.557501431081759	8.52289861980831	-7.70453981614524	1.72206659801665e-13	1.66804097925534e-12	19.8492006706823
NNMT	-0.582369076312728	7.41186811501597	-7.44825547452491	9.14725876089201e-13	8.21954653696126e-12	18.2103959968648
CEBPD	-0.546237081173139	8.43120238658147	-7.41293517893192	1.14805520479598e-12	1.01940859789293e-11	17.987563837978
MSR1	-0.545881958333334	5.07034999361022	-7.39876002583228	1.25740326688671e-12	1.11260138783414e-11	17.8983430863312
PTX3	-0.945390140952139	4.8654716485623	-7.3964446531733	1.27621438552475e-12	1.12826041747789e-11	17.8837811417914
THBS1	-0.688805542289789	9.44573269329073	-7.29362758995669	2.45997675122305e-12	2.09170315362181e-11	17.2403825738456
CCL2	-0.948275316716513	8.34142614696486	-7.19431765055419	4.60943547687702e-12	3.8012828236428e-11	16.6250092943677
CYBB	-0.565425315844131	7.58784071565495	-7.07236285234355	9.88661102729275e-12	7.82812430597292e-11	15.8776089434454
SPP1	-0.948179961781314	6.61902695207668	-6.98211952078208	1.72884307140749e-11	1.32988938732576e-10	15.330518387076
ARNTL	-0.505595819707541	6.35325642811502	-6.9381950032124	2.26519871032357e-11	1.71511531509883e-10	15.0660874078753
FAM155B	-0.614269238285136	6.89910357188498	-6.92074813716437	2.52101172440618e-11	1.89886840707039e-10	14.9613947031533
MT1M	-0.779293138044197	7.3791661341853	-6.86990307796777	3.43977846490027e-11	2.54453152038313e-10	14.6573973265918
CNTN3	-0.518697831422399	4.79323267092652	-6.86662578009421	3.50917746742163e-11	2.59208170770086e-10	14.637859397486
LDLR	-0.504475846834488	7.06571427476038	-6.86113137049815	3.62862652440535e-11	2.67836011754031e-10	14.6051193866752
C3	-0.612759465977065	9.68824934824281	-6.783353770178	5.81628015116017e-11	4.16853992150028e-10	14.1437425176562
MYC	-0.564690516949154	6.64297371884984	-6.70625860001806	9.24954483519043e-11	6.4622380507743e-10	13.6902804093166
C1orf118	-0.514705205674635	5.64440519488818	-6.69559609677624	9.85953387321017e-11	6.86709075199446e-10	13.6278703131015
FMO5	-0.540159430084745	4.37768855591054	-6.67799020048128	1.09543177395187e-10	7.56198880355189e-10	13.5249819413102
FCGR2A	-0.514070509222329	5.79032525239617	-6.5508751325097	2.32913607492414e-10	1.54777908016011e-09	12.7881892333528
C3AR1	-0.533192138791962	6.65003373162939	-6.54057252113854	2.47485426917662e-10	1.64131297864778e-09	12.7289422449818
HMGCS2	-1.12749884990861	6.33402047284345	-6.50644774061957	3.02433467065926e-10	1.98492788138472e-09	12.5332081569563
SOCS3	-0.540638269857093	5.33512547284345	-6.4249827738215	4.86611762530948e-10	3.1051778948651e-09	12.0691005794047
FCGR1A	-0.598389739572947	4.63211749201278	-6.23920576291734	1.41617840093995e-09	8.5138846342053e-09	11.0275986198474
FCGR1B	-0.540398030284147	4.75670080511182	-6.20570647429991	1.71282343648584e-09	1.01764522976193e-08	10.8423214145894
CHI3L1	-0.676099189140908	4.99275303833866	-6.19565310083476	1.81315938020582e-09	1.07442159411026e-08	10.786870350832
ANGPTL4	-0.524958494682616	5.17492328115016	-5.79867690477046	1.62460173081972e-08	8.57786325756583e-08	8.65430141418269
AQP4	-0.601730560734467	5.69559550159744	-5.23824258776562	2.97176965775898e-07	1.32199039420713e-06	5.83981565904148
S100A12	-0.566304784687597	4.54955030670927	-5.09881396323511	5.9098319204368e-07	2.5215448855388e-06	5.17667282630925
ADH1B	-0.559655510759384	7.59811301277955	-5.04360529069235	7.7277148678856e-07	3.2519662774601e-06	4.91827658174538
TNC	-0.71806769341974	6.3387688370607	-4.65928245819137	4.68844713170634e-06	1.75851496677e-05	3.18649159661504
DHRS7C	-0.522825249335329	5.87255948881789	-4.35223114325732	1.82349685555281e-05	6.23554031949463e-05	1.88898472502712
