# Supplementary material for: Identification and analysis of mitochondria-related key genes of heart failure
Source: J Transl Med. 2022 Sep 7;20:410. doi: 10.1186/s12967-022-03605-2 (PMC9450345; doi:10.1186/s12967-022-03605-2)
Supplement: Supplementary file 6 — Additional file 6: Table S6. CTD database sources key genes. [file 12967_2022_3605_MOESM6_ESM.xlsx]

## Sheet: Sheet1
Key Gene	Chemical Name	Chemical ID	CAS RN	Interaction Count	Organism Count
IFIT3	Tretinoin	D014212	302-79-4	12	1
IFIT3	Tetrachlorodibenzodioxin	D013749	1746-01-6	9	3
IFIT3	Lipopolysaccharides	D008070		8	2
IFIT3	Benzo(a)pyrene	D001564	50-32-8	7	2
IFIT3	Acetaminophen	D000082	103-90-2	6	3
IFIT3	Estradiol	D004958	50-28-2	6	3
IFIT3	Nanotubes, Carbon	D037742		4	1
IFIT3	Valproic Acid	D014635	99-66-1	4	1
IFIT3	1,2-Dimethylhydrazine	D019813	540-73-8	3	2
IFIT3	bisphenol A	C006780	1980-05-07	3	2
IFIT3	Copper	D003300	7440-50-8	3	2
IFIT3	Dietary Fats	D004041		3	2
IFIT3	(+)-JQ1 compound	C561695		3	1
IFIT3	Progesterone	D011374	57-83-0	3	2
IFIT3	trichostatin A	C012589	58880-19-6	3	1
IFIT3	2,2',4,4'-tetrabromodiphenyl ether	C511295		2	2
IFIT3	4-(5-benzo(1,3)dioxol-5-yl-4-pyridin-2-yl-1H-imidazol-2-yl)benzamide	C459179		2	1
IFIT3	Asbestos, Serpentine	D017632		2	1
IFIT3	Benzene	D001554	71-43-2	2	1
IFIT3	bis(4-hydroxyphenyl)sulfone	C543008	1980-09-01	2	1
IFIT3	BIX 01294	C518299		2	1
IFIT3	Cadmium Chloride	D019256	10108-64-2	2	2
IFIT3	Cisplatin	D002945	15663-27-1	2	1
IFIT3	Clofibrate	D002994	637-07-0	2	1
IFIT3	Cyclosporine	D016572	59865-13-3	2	1
IFIT3	dorsomorphin	C516138		2	1
IFIT3	Doxorubicin	D004317	23214-92-8	2	2
IFIT3	ethylene dichloride	C024565	107-06-2	2	1
IFIT3	Folic Acid	D005492	59-30-3	2	1
IFIT3	Formaldehyde	D005557	50-00-0	2	1
IFIT3	Hydroxychloroquine	D006886	118-42-3	2	2
IFIT3	Nickel	D009532	7440-02-0	2	1
IFIT3	NSC 689534	C558013		2	1
IFIT3	Oxaliplatin	D000077150		2	1
IFIT3	Phenylmercuric Acetate	D010662	62-38-4	2	1
IFIT3	pirinixic acid	C006253	50892-23-4	2	1
IFIT3	Plant Extracts	D010936		2	1
IFIT3	polyhexamethyleneguanidine	C060540	31961-54-3	2	1
IFIT3	potassium chromate(VI)	C027373	7789-00-6	2	1
IFIT3	Silicon Dioxide	D012822	7631-86-9	2	2
IFIT3	Tamoxifen	D013629	10540-29-1	2	2
IFIT3	tert-Butylhydroperoxide	D020122	75-91-2	2	1
IFIT3	titanium dioxide	C009495	13463-67-7	2	1
IFIT3	Tobacco Smoke Pollution	D014028		2	1
IFIT3	Topotecan	D019772	123948-87-8	2	1
IFIT3	Trichloroethylene	D014241	1979-01-06	2	2
IFIT3	Zinc	D015032	7440-66-6	2	1
IFIT3	1,2-dioleoyloxy-3-(trimethylammonium)propane	C070046	113669-21-9	1	1
IFIT3	2-bromopalmitate	C022776	18263-25-7	1	1
IFIT3	2-xylene	C026114	95-47-6	1	1
IFIT3	4-(4-((5-(4,5-dimethyl-2-nitrophenyl)-2-furanyl)methylene)-4,5-dihydro-3-methyl-5-oxo-1H-pyrazol-1-yl)benzoic acid	C584509		1	1
IFIT3	4-hydroxy-2-nonenal	C027576	29343-52-0	1	1
IFIT3	7,8-Dihydro-7,8-dihydroxybenzo(a)pyrene 9,10-oxide	D015123	55097-80-8	1	1
IFIT3	abrine	C496492		1	1
IFIT3	acetamide	C030686	60-35-5	1	1
IFIT3	Aconitine	D000157	302-27-2	1	1
IFIT3	Aflatoxin B1	D016604	1162-65-8	1	1
IFIT3	afuresertib	C000593263		1	1
IFIT3	Amphetamine	D000661	300-62-9	1	1
IFIT3	Arbutin	D001104	497-76-7	1	1
IFIT3	Arsenic Trioxide	D000077237	1327-53-3	1	1
IFIT3	Astemizole	D016589	68844-77-9	1	1
IFIT3	Atrazine	D001280	1912-24-9	1	1
IFIT3	avobenzone	C049935		1	1
IFIT3	Azathioprine	D001379	446-86-6	1	1
IFIT3	belinostat	C487081		1	1
IFIT3	benz(a)anthracene	C030935	56-55-3	1	1
IFIT3	beta-Naphthoflavone	D019324	6051-87-2	1	1
IFIT3	butyraldehyde	C018475	123-72-8	1	1
IFIT3	Butyrates	D002087		1	1
IFIT3	Calcitriol	D002117	32222-06-3	1	1
IFIT3	chlorophyllin	C007020	15611-43-5	1	1
IFIT3	Cholesterol	D002784	57-88-5	1	1
IFIT3	Clioquinol	D007464	130-26-7	1	1
IFIT3	Dasatinib	D000069439		1	1
IFIT3	Demecolcine	D003703	477-30-5	1	1
IFIT3	Dichloroacetic Acid	D003999	79-43-6	1	1
IFIT3	Diclofenac	D004008	15307-86-5	1	1
IFIT3	Dieldrin	D004026	60-57-1	1	1
IFIT3	diethyl maleate	C014476	141-05-9	1	1
IFIT3	Diethylstilbestrol	D004054	56-53-1	1	1
IFIT3	dimethylarsinous acid	C472511		1	1
IFIT3	Disulfiram	D004221	97-77-8	1	1
IFIT3	Dronabinol	D013759		1	1
IFIT3	Endosulfan	D004726	115-29-7	1	1
IFIT3	epigallocatechin gallate	C045651	989-51-5	1	1
IFIT3	estradiol 3-benzoate	C074283	50-50-0	1	1
IFIT3	ethylbenzene	C004912	100-41-4	1	1
IFIT3	Ethylenethiourea	D005031	96-45-7	1	1
IFIT3	Ethyl Methanesulfonate	D005020	62-50-0	1	1
IFIT3	Fenretinide	D017313	65646-68-6	1	1
IFIT3	Flutamide	D005485	13311-84-7	1	1
IFIT3	gadodiamide	C064925		1	1
IFIT3	genipin	C007834	6902-77-8	1	1
IFIT3	Genistein	D019833	446-72-0	1	1
IFIT3	Gentamicins	D005839		1	1
IFIT3	Glucosamine	D005944	3416-24-8	1	1
IFIT3	Gold Sodium Thiomalate	D006052	12244-57-4	1	1
IFIT3	hexamethylene bisacetamide	C014026	3073-59-4	1	1
IFIT3	hydroquinone	C031927	123-31-9	1	1
IFIT3	ICG 001	C492448		1	1
IFIT3	Ionomycin	D015759	56092-81-0	1	1
IFIT3	jinfukang	C544151		1	1
IFIT3	lipopolysaccharide, E coli O55-B5	C482199		1	1
IFIT3	Magnetite Nanoparticles	D058185		1	1
IFIT3	Methamphetamine	D008694	537-46-2	1	1
IFIT3	Methotrexate	D008727	1959-05-02	1	1
IFIT3	Methylcholanthrene	D008748	56-49-5	1	1
IFIT3	methyldithiocarbamate	C008435	144-54-7	1	1
IFIT3	Methylene Chloride	D008752	1975-09-02	1	1
IFIT3	methylmercuric chloride	C004925	115-09-3	1	1
IFIT3	Methylprednisolone	D008775	83-43-2	1	1
IFIT3	Mustard Gas	D009151	505-60-2	1	1
IFIT3	N4-(2,2-dimethyl-3-oxo-4H-pyrid(1,4)oxazin-6-yl)-5-fluoro-N2-(3,4,5-trimethoxyphenyl)-2,4-pyrimidinediamine	C510788		1	1
IFIT3	Oxazolone	D010081	15646-46-5	1	1
IFIT3	Ozone	D010126	10028-15-6	1	1
IFIT3	Particulate Matter	D052638		1	1
IFIT3	pentabromodiphenyl ether	C086401	32534-81-9	1	1
IFIT3	Pentachlorophenol	D010416	87-86-5	1	1
IFIT3	Phenobarbital	D010634	1950-06-06	1	1
IFIT3	Polychlorinated Biphenyls	D011078		1	1
IFIT3	Povidone	D011205		1	1
IFIT3	Prednisolone	D011239	50-24-8	1	1
IFIT3	propiconazole	C045950	60207-90-1	1	1
IFIT3	Resveratrol	D000077185		1	1
IFIT3	Silver	D012834	7440-22-4	1	1
IFIT3	Soman	D012999	96-64-0	1	1
IFIT3	Succimer	D004113	304-55-2	1	1
IFIT3	sulforaphane	C016766		1	1
IFIT3	systhane	C446685		1	1
IFIT3	tamibarotene	C061133	94497-51-5	1	1
IFIT3	Temozolomide	D000077204	85622-93-1	1	1
IFIT3	Testosterone	D013739	58-22-0	1	1
IFIT3	testosterone enanthate	C004648		1	1
IFIT3	tetrabromobisphenol A	C020806	79-94-7	1	1
IFIT3	Tetradecanoylphorbol Acetate	D013755	16561-29-8	1	1
IFIT3	Thiophenes	D013876		1	1
IFIT3	tofacitinib	C479163		1	1
IFIT3	Toluene	D014050	108-88-3	1	1
IFIT3	tributyltin	C011559	688-73-3	1	1
IFIT3	Triclosan	D014260	3380-34-5	1	1
IFIT3	triptolide	C001899	38748-32-2	1	1
IFIT3	UNC 0638	C561310		1	1
IFIT3	Vancomycin	D014640	1404-90-6	1	1
IFIT3	Vehicle Emissions	D001335		1	1
IFIT3	Vitamin K 3	D024483	58-27-5	1	1
MX1	Benzo(a)pyrene	D001564	50-32-8	9	2
MX1	(+)-JQ1 compound	C561695		9	2
MX1	Lipopolysaccharides	D008070		8	2
MX1	Poly I-C	D011070		8	2
MX1	Silicon Dioxide	D012822	7631-86-9	5	2
MX1	bisphenol A	C006780	29348	4	2
MX1	Cyclosporine	D016572	59865-13-3	4	1
MX1	Estradiol	D004958	50-28-2	4	3
MX1	Nickel	D009532	7440-02-0	4	1
MX1	Tetrachlorodibenzodioxin	D013749	1746-01-6	4	2
MX1	2,2',4,4'-tetrabromodiphenyl ether	C511295		3	1
MX1	Acetaminophen	D000082	103-90-2	3	2
MX1	Decitabine	D000077209	2353-33-5	3	1
MX1	Dieldrin	D004026	60-57-1	3	2
MX1	Nanotubes, Carbon	D037742		3	1
MX1	Ozone	D010126	10028-15-6	3	1
MX1	potassium chromate(VI)	C027373	7789-00-6	3	1
MX1	tert-Butylhydroperoxide	D020122	75-91-2	3	2
MX1	3,4,5,3',4'-pentachlorobiphenyl	C023035	57465-28-8	2	1
MX1	Acrolein	D000171	107-02-8	2	1
MX1	alpha-pinene	C005451	80-56-8	2	1
MX1	alvocidib	C077990		2	1
MX1	Antigens, Bacterial	D000942		2	1
MX1	Asbestos, Serpentine	D017632		2	1
MX1	Benzene	D001554	71-43-2	2	1
MX1	Cadmium Chloride	D019256	10108-64-2	2	2
MX1	Chlorpyrifos	D004390	2921-88-2	2	1
MX1	Copper	D003300	7440-50-8	2	2
MX1	Diethylhexyl Phthalate	D004051	117-81-7	2	1
MX1	Doxorubicin	D004317	23214-92-8	2	2
MX1	epigallocatechin gallate	C045651	989-51-5	2	1
MX1	Ethinyl Estradiol	D004997	57-63-6	2	1
MX1	Genistein	D019833	446-72-0	2	1
MX1	methacrylaldehyde	C039175	78-85-3	2	1
MX1	Ovalbumin	D010047	9006-59-1	2	1
MX1	Oxaliplatin	D000077150		2	1
MX1	Paraquat	D010269	4685-14-7	2	2
MX1	Plant Extracts	D010936		2	1
MX1	sodium arsenite	C017947	13768-07-5	2	2
MX1	Testosterone	D013739	58-22-0	2	2
MX1	Tetradecanoylphorbol Acetate	D013755	16561-29-8	2	2
MX1	titanium dioxide	C009495	13463-67-7	2	2
MX1	Tobacco Smoke Pollution	D014028		2	2
MX1	Topotecan	D019772	123948-87-8	2	1
MX1	Triclosan	D014260	3380-34-5	2	2
MX1	Valproic Acid	D014635	99-66-1	2	1
MX1	2,3,7,8-tetrachlorodibenzofuran	C014211	51207-31-9	1	1
MX1	2,4,5,2',4',5'-hexachlorobiphenyl	C014024	35065-27-1	1	1
MX1	4-(4-((5-(4,5-dimethyl-2-nitrophenyl)-2-furanyl)methylene)-4,5-dihydro-3-methyl-5-oxo-1H-pyrazol-1-yl)benzoic acid	C584509		1	1
MX1	4,4'-diaminodiphenylmethane	C009505	101-77-9	1	1
MX1	4-hydroxy-2-nonenal	C027576	29343-52-0	1	1
MX1	7,7'-dimethoxy-(4,4'-bi-1,3-benzodioxole)-5,5'-dicarboxylic acid dimethyl ester	C041398	73536-69-3	1	1
MX1	abrine	C496492		1	1
MX1	acetamide	C030686	60-35-5	1	1
MX1	Acetylcysteine	D000111	616-91-1	1	1
MX1	Acrylamide	D020106	29007	1	1
MX1	actein	C096064	18642-44-9	1	1
MX1	Air Pollutants	D000393		1	1
MX1	Ammonium Chloride	D000643	12125-02-9	1	1
MX1	Amphetamine	D000661	300-62-9	1	1
MX1	Arsenic	D001151	7440-38-2	1	1
MX1	Arsenic Trioxide	D000077237	1327-53-3	1	1
MX1	Asbestos, Crocidolite	D017638	12001-28-4	1	1
MX1	Aspirin	D001241	50-78-2	1	1
MX1	Azathioprine	D001379	446-86-6	1	1
MX1	bromobenzene	C032036	108-86-1	1	1
MX1	Cadmium	D002104	7440-43-9	1	1
MX1	Carbon Tetrachloride	D002251	56-23-5	1	1
MX1	chlorophyllin	C007020	15611-43-5	1	1
MX1	chromium hexavalent ion	C074702	18540-29-9	1	1
MX1	cinnamaldehyde	C012843		1	1
MX1	Cisplatin	D002945	15663-27-1	1	1
MX1	Cuprizone	D003471	370-81-0	1	1
MX1	decabromobiphenyl ether	C010902	1163-19-5	1	1
MX1	Dichloroacetic Acid	D003999	79-43-6	1	1
MX1	Dichlororibofuranosylbenzimidazole	D004004	53-85-0	1	1
MX1	Diclofenac	D004008	15307-86-5	1	1
MX1	Dietary Fats	D004041		1	1
MX1	diethyl maleate	C014476	141-05-9	1	1
MX1	dimethylarsinous acid	C472511		1	1
MX1	Disulfiram	D004221	97-77-8	1	1
MX1	Endosulfan	D004726	115-29-7	1	1
MX1	estradiol 3-benzoate	C074283	50-50-0	1	1
MX1	fenvalerate	C017690	51630-58-1	1	1
MX1	Folic Acid	D005492	59-30-3	1	1
MX1	Formaldehyde	D005557	50-00-0	1	1
MX1	Fulvestrant	D000077267	129453-61-8	1	1
MX1	genipin	C007834	6902-77-8	1	1
MX1	Gentamicins	D005839		1	1
MX1	Gold Sodium Thiomalate	D006052	12244-57-4	1	1
MX1	GW 4064	C412815		1	1
MX1	hexabrominated diphenyl ether 153	C517828		1	1
MX1	hydroquinone	C031927	123-31-9	1	1
MX1	ICG 001	C492448		1	1
MX1	Ionomycin	D015759	56092-81-0	1	1
MX1	Iopamidol	D007479	62883-00-5	1	1
MX1	Lactic Acid	D019344	50-21-5	1	1
MX1	Latex	D007840		1	1
MX1	lipopolysaccharide, E coli O55-B5	C482199		1	1
MX1	Lucanthone	D008154	479-50-5	1	1
MX1	Methamphetamine	D008694	537-46-2	1	1
MX1	Methotrexate	D008727	21672	1	1
MX1	methyldithiocarbamate	C008435	144-54-7	1	1
MX1	Methylprednisolone	D008775	83-43-2	1	1
MX1	Mitomycin	D016685	18451	1	1
MX1	monomethylarsonic acid	C020300	124-58-3	1	1
MX1	Mustard Gas	D009151	505-60-2	1	1
MX1	N4-(2,2-dimethyl-3-oxo-4H-pyrid(1,4)oxazin-6-yl)-5-fluoro-N2-(3,4,5-trimethoxyphenyl)-2,4-pyrimidinediamine	C510788		1	1
MX1	nickel sulfate	C029938	7786-81-4	1	1
MX1	pentabromodiphenyl ether	C086401	32534-81-9	1	1
MX1	Pentachlorophenol	D010416	87-86-5	1	1
MX1	pentanal	C046012	110-62-3	1	1
MX1	perfluorooctanoic acid	C023036	335-67-1	1	1
MX1	perfluoroundecanoic acid	C586085		1	1
MX1	Perfume	D010476		1	1
MX1	Piroxicam	D010894	36322-90-4	1	1
MX1	Prednisolone	D011239	50-24-8	1	1
MX1	Progesterone	D011374	57-83-0	1	1
MX1	Propylthiouracil	D011441	51-52-5	1	1
MX1	Protein Kinase Inhibitors	D047428		1	1
MX1	S-1,2-dichlorovinyl-N-acetylcysteine	C049705	104713-70-4	1	1
MX1	Selenium	D012643	7782-49-2	1	1
MX1	Silver	D012834	7440-22-4	1	1
MX1	Smoke	D012906		1	1
MX1	Soman	D012999	96-64-0	1	1
MX1	sulindac sulfide	C025462	32004-67-4	1	1
MX1	Tamoxifen	D013629	10540-29-1	1	1
MX1	Temozolomide	D000077204	85622-93-1	1	1
MX1	testosterone enanthate	C004648		1	1
MX1	Tetrachloroethylene	D013750	127-18-4	1	1
MX1	tofacitinib	C479163		1	1
MX1	tremolite	C005846	14567-73-8	1	1
MX1	Tretinoin	D014212	302-79-4	1	1
MX1	Trichloroethylene	D014241	28861	1	1
MX1	trichostatin A	C012589	58880-19-6	1	1
MX1	triptolide	C001899	38748-32-2	1	1
MX1	UNC 0638	C561310		1	1
MX1	Vehicle Emissions	D001335		1	1
MX1	Vitamin E	D014810	1406-18-4	1	1
MX1	Volatile Organic Compounds	D055549		1	1
MX1	Vorinostat	D000077337		1	1
MX1	Zidovudine	D015215	30516-87-1	1	1
RSAD2	Tetrachlorodibenzodioxin	D013749	1746-01-6	8	3
RSAD2	Benzo(a)pyrene	D001564	50-32-8	6	2
RSAD2	bisphenol A	C006780	29348	4	3
RSAD2	Carbon Tetrachloride	D002251	56-23-5	4	1
RSAD2	Lipopolysaccharides	D008070		4	1
RSAD2	Nanotubes, Carbon	D037742		4	1
RSAD2	Cannabidiol	D002185	13956-29-1	3	1
RSAD2	lipopolysaccharide, E coli O55-B5	C482199		3	1
RSAD2	Magnetite Nanoparticles	D058185		3	2
RSAD2	Phenobarbital	D010634	18420	3	1
RSAD2	Silicon Dioxide	D012822	7631-86-9	3	2
RSAD2	sodium arsenite	C017947	13768-07-5	3	1
RSAD2	Succimer	D004113	304-55-2	3	2
RSAD2	Tamoxifen	D013629	10540-29-1	3	2
RSAD2	tert-Butylhydroperoxide	D020122	75-91-2	3	2
RSAD2	2,2',4,4'-tetrabromodiphenyl ether	C511295		2	2
RSAD2	3,4,5,3',4'-pentachlorobiphenyl	C023035	57465-28-8	2	1
RSAD2	4-nonylphenol	C041594	104-40-5	2	1
RSAD2	Acetaminophen	D000082	103-90-2	2	2
RSAD2	Cyclosporine	D016572	59865-13-3	2	2
RSAD2	Dibutyl Phthalate	D003993	84-74-2	2	1
RSAD2	Dietary Fats	D004041		2	2
RSAD2	Diethylhexyl Phthalate	D004051	117-81-7	2	1
RSAD2	Doxorubicin	D004317	23214-92-8	2	2
RSAD2	Dronabinol	D013759		2	1
RSAD2	Formaldehyde	D005557	50-00-0	2	1
RSAD2	Gentamicins	D005839		2	1
RSAD2	GSK3235025	C000599896		2	1
RSAD2	Hydroxychloroquine	D006886	118-42-3	2	2
RSAD2	Meloxicam	D000077239	71125-38-7	2	1
RSAD2	Methotrexate	D008727	21672	2	2
RSAD2	monomethylarsonous acid	C406082		2	1
RSAD2	Nickel	D009532	7440-02-0	2	1
RSAD2	pirinixic acid	C006253	50892-23-4	2	2
RSAD2	propiconazole	C045950	60207-90-1	2	1
RSAD2	Tobacco Smoke Pollution	D014028		2	2
RSAD2	Tretinoin	D014212	302-79-4	2	2
RSAD2	Triclosan	D014260	3380-34-5	2	2
RSAD2	1,12-benzoperylene	C006718	191-24-2	1	1
RSAD2	1,2-Dimethylhydrazine	D019813	540-73-8	1	1
RSAD2	1-Methyl-4-phenylpyridinium	D015655	48134-75-4	1	1
RSAD2	2,4,5,2',4',5'-hexachlorobiphenyl	C014024	35065-27-1	1	1
RSAD2	2,4-diaminotoluene	C010914	95-80-7	1	1
RSAD2	2,6-dinitrotoluene	C023514	606-20-2	1	1
RSAD2	2-Acetylaminofluorene	D015073	53-96-3	1	1
RSAD2	2-nitrofluorene	C019499	607-57-8	1	1
RSAD2	4-hydroxy-2-nonenal	C027576	29343-52-0	1	1
RSAD2	abrine	C496492		1	1
RSAD2	acetamide	C030686	60-35-5	1	1
RSAD2	Acrylamide	D020106	29007	1	1
RSAD2	alpha phellandrene	C005403	99-83-2	1	1
RSAD2	Aluminum	D000535	7429-90-5	1	0
RSAD2	Ammonium Chloride	D000643	12125-02-9	1	1
RSAD2	Antigens, Polyomavirus Transforming	D000952		1	1
RSAD2	Arsenic	D001151	7440-38-2	1	1
RSAD2	arsenite	C015001	15502-74-6	1	1
RSAD2	Asbestos, Serpentine	D017632		1	1
RSAD2	Atrazine	D001280	1912-24-9	1	1
RSAD2	avobenzone	C049935		1	1
RSAD2	Azathioprine	D001379	446-86-6	1	1
RSAD2	AZM551248	C547126		1	1
RSAD2	benazepril	C044946	86541-75-5	1	1
RSAD2	benz(a)anthracene	C030935	56-55-3	1	1
RSAD2	bis(4-hydroxyphenyl)sulfone	C543008	29465	1	1
RSAD2	Cacodylic Acid	D002101	75-60-5	1	1
RSAD2	Cadmium Chloride	D019256	10108-64-2	1	1
RSAD2	Calcitriol	D002117	32222-06-3	1	1
RSAD2	Chlordecone	D007631	143-50-0	1	1
RSAD2	Chloroprene	D002737	126-99-8	1	1
RSAD2	chloroquine diphosphate	C023676	50-63-5	1	1
RSAD2	Cholecalciferol	D002762	67-97-0	1	1
RSAD2	chromium hexavalent ion	C074702	18540-29-9	1	1
RSAD2	Cisplatin	D002945	15663-27-1	1	1
RSAD2	cobaltous chloride	C018021	7646-79-9	1	1
RSAD2	Copper	D003300	7440-50-8	1	1
RSAD2	Cuprizone	D003471	370-81-0	1	1
RSAD2	cyproconazole	C093628		1	1
RSAD2	DDT	D003634	50-29-3	1	1
RSAD2	Dichloroacetic Acid	D003999	79-43-6	1	1
RSAD2	Diclofenac	D004008	15307-86-5	1	1
RSAD2	dicyclohexyl phthalate	C036042	84-61-7	1	1
RSAD2	diethyl maleate	C014476	141-05-9	1	1
RSAD2	dimethyl phthalate	C024629	131-11-3	1	1
RSAD2	Disulfiram	D004221	97-77-8	1	1
RSAD2	Endosulfan	D004726	115-29-7	1	1
RSAD2	epoxiconazole	C109476		1	1
RSAD2	Estradiol	D004958	50-28-2	1	1
RSAD2	Ethinyl Estradiol	D004997	57-63-6	1	1
RSAD2	ethylene dichloride	C024565	107-06-2	1	1
RSAD2	Folic Acid	D005492	59-30-3	1	1
RSAD2	gadodiamide	C064925		1	1
RSAD2	genipin	C007834	6902-77-8	1	1
RSAD2	glycidol	C004312	556-52-5	1	1
RSAD2	glyphosate	C010974	1071-83-6	1	1
RSAD2	Gold Sodium Thiomalate	D006052	12244-57-4	1	1
RSAD2	GW 4064	C412815		1	1
RSAD2	Hexachlorocyclohexane	D001556		1	1
RSAD2	Iohexol	D007472	66108-95-0	1	1
RSAD2	Ionomycin	D015759	56092-81-0	1	1
RSAD2	Iopamidol	D007479	62883-00-5	1	1
RSAD2	(+)-JQ1 compound	C561695		1	1
RSAD2	Lactic Acid	D019344	50-21-5	1	1
RSAD2	manganese chloride	C025340	2145076	1	1
RSAD2	Mercuric Chloride	D008627	7487-94-7	1	1
RSAD2	Mercury	D008628	7439-97-6	1	1
RSAD2	Methylcholanthrene	D008748	56-49-5	1	1
RSAD2	Methylprednisolone	D008775	83-43-2	1	1
RSAD2	monomethyl phthalate	C517284		1	1
RSAD2	N4-(2,2-dimethyl-3-oxo-4H-pyrid(1,4)oxazin-6-yl)-5-fluoro-N2-(3,4,5-trimethoxyphenyl)-2,4-pyrimidinediamine	C510788		1	1
RSAD2	nitrofen	C007350		1	1
RSAD2	ochratoxin A	C025589	303-47-9	1	1
RSAD2	PAM2-CSK4	C000711848		1	1
RSAD2	Particulate Matter	D052638		1	1
RSAD2	Pentachlorophenol	D010416	87-86-5	1	1
RSAD2	perfluorooctanoic acid	C023036	335-67-1	1	1
RSAD2	Piroxicam	D010894	36322-90-4	1	1
RSAD2	Polychlorinated Biphenyls	D011078		1	1
RSAD2	Prednisolone	D011239	50-24-8	1	1
RSAD2	Progesterone	D011374	57-83-0	1	1
RSAD2	Propylthiouracil	D011441	51-52-5	1	1
RSAD2	Quercetin	D011794	117-39-5	1	1
RSAD2	Rapeseed Oil	D000074262		1	1
RSAD2	Resveratrol	D000077185		1	1
RSAD2	Rotenone	D012402	83-79-4	1	1
RSAD2	Silver	D012834	7440-22-4	1	1
RSAD2	sodium bichromate	C016104	10588-01-9	1	1
RSAD2	systhane	C446685		1	1
RSAD2	Temozolomide	D000077204	85622-93-1	1	1
RSAD2	testosterone enanthate	C004648		1	1
RSAD2	tetrabromobisphenol A	C020806	79-94-7	1	1
RSAD2	Tetradecanoylphorbol Acetate	D013755	16561-29-8	1	1
RSAD2	titanium dioxide	C009495	13463-67-7	1	1
RSAD2	tofacitinib	C479163		1	1
RSAD2	Toxins, Biological	D014118		1	1
RSAD2	tremolite	C005846	14567-73-8	1	1
RSAD2	tributyltin	C011559	688-73-3	1	1
RSAD2	Trichloroethylene	D014241	28861	1	1
RSAD2	Trinitrotoluene	D014303	118-96-7	1	1
RSAD2	triphenyl phosphate	C005445	115-86-6	1	1
RSAD2	Tungsten	D014414	7440-33-7	1	1
RSAD2	Tunicamycin	D014415	11089-65-9	1	1
RSAD2	urushiol	C003747	53237-59-5	1	1
RSAD2	Valproic Acid	D014635	99-66-1	1	1
RSAD2	Zidovudine	D015215	30516-87-1	1	1
XAF1	Decitabine	D000077209	2353-33-5	7	1
XAF1	Azacitidine	D001374	320-67-2	6	1
XAF1	glyphosate	C010974	1071-83-6	6	1
XAF1	Temozolomide	D000077204	85622-93-1	6	1
XAF1	Tretinoin	D014212	302-79-4	5	2
XAF1	Nanotubes, Carbon	D037742		4	1
XAF1	Acetaminophen	D000082	103-90-2	3	2
XAF1	Benzo(a)pyrene	D001564	50-32-8	3	2
XAF1	Cyclosporine	D016572	59865-13-3	3	1
XAF1	Fluorouracil	D005472	51-21-8	3	2
XAF1	Tobacco Smoke Pollution	D014028		3	1
XAF1	2,2',4,4'-tetrabromodiphenyl ether	C511295		2	2
XAF1	Atrazine	D001280	1912-24-9	2	2
XAF1	bis(4-hydroxyphenyl)sulfone	C543008	29465	2	2
XAF1	bisphenol A	C006780	29348	2	2
XAF1	Cisplatin	D002945	15663-27-1	2	1
XAF1	Curcumin	D003474	458-37-7	2	1
XAF1	Etoposide	D005047	33419-42-0	2	1
XAF1	(+)-JQ1 compound	C561695		2	1
XAF1	Magnetite Nanoparticles	D058185		2	1
XAF1	Methotrexate	D008727	21672	2	1
XAF1	monomethylarsonous acid	C406082		2	1
XAF1	Nickel	D009532	7440-02-0	2	1
XAF1	ochratoxin A	C025589	303-47-9	2	1
XAF1	sodium arsenite	C017947	13768-07-5	2	1
XAF1	Succimer	D004113	304-55-2	2	1
XAF1	Vehicle Emissions	D001335		2	2
XAF1	1,2-Dimethylhydrazine	D019813	540-73-8	1	1
XAF1	3,4,5,3',4'-pentachlorobiphenyl	C023035	57465-28-8	1	1
XAF1	4-hydroxy-2-nonenal	C027576	29343-52-0	1	1
XAF1	Aflatoxin B1	D016604	1162-65-8	1	1
XAF1	alpha phellandrene	C005403	99-83-2	1	1
XAF1	Arsenic Trioxide	D000077237	1327-53-3	1	1
XAF1	arsenite	C015001	15502-74-6	1	1
XAF1	avobenzone	C049935		1	1
XAF1	benz(a)anthracene	C030935	56-55-3	1	1
XAF1	Bortezomib	D000069286		1	1
XAF1	butylparaben	C038091	94-26-8	1	1
XAF1	butyraldehyde	C018475	123-72-8	1	1
XAF1	Cannabidiol	D002185	13956-29-1	1	1
XAF1	Carbon Tetrachloride	D002251	56-23-5	1	1
XAF1	Chlordecone	D007631	143-50-0	1	1
XAF1	Cyclophosphamide	D003520	50-18-0	1	1
XAF1	decabromobiphenyl ether	C010902	1163-19-5	1	1
XAF1	dimethylarsinous acid	C472511		1	1
XAF1	Dronabinol	D013759		1	1
XAF1	Drugs, Chinese Herbal	D004365		1	1
XAF1	Endosulfan	D004726	115-29-7	1	1
XAF1	epigallocatechin gallate	C045651	989-51-5	1	1
XAF1	Estradiol	D004958	50-28-2	1	1
XAF1	ethylene dichloride	C024565	107-06-2	1	1
XAF1	Ethyl Methanesulfonate	D005020	62-50-0	1	1
XAF1	Folic Acid	D005492	59-30-3	1	1
XAF1	Formaldehyde	D005557	50-00-0	1	1
XAF1	Gentamicins	D005839		1	1
XAF1	Hydrogen Peroxide	D006861	7722-84-1	1	1
XAF1	hydroquinone	C031927	123-31-9	1	1
XAF1	Ionomycin	D015759	56092-81-0	1	1
XAF1	lead acetate	C008261	301-04-2	1	1
XAF1	Methyl Methanesulfonate	D008741	66-27-3	1	1
XAF1	Naphthoquinones	D009285		1	1
XAF1	nickel sulfate	C029938	7786-81-4	1	1
XAF1	N-nitroso-tris-chloroethylurea	C572573		1	1
XAF1	Pentachlorophenol	D010416	87-86-5	1	1
XAF1	Pentosan Sulfuric Polyester	D010426	37300-21-3	1	1
XAF1	perfluoro-n-nonanoic acid	C101816	375-95-1	1	1
XAF1	perfluorooctane sulfonic acid	C076994	1763-23-1	1	1
XAF1	Phenobarbital	D010634	18420	1	1
XAF1	Plant Extracts	D010936		1	1
XAF1	Progesterone	D011374	57-83-0	1	1
XAF1	pyrazolanthrone	C432165		1	1
XAF1	Silver	D012834	7440-22-4	1	1
XAF1	Silver Compounds	D018030		1	1
XAF1	Sodium Selenite	D018038	10102-18-8	1	1
XAF1	sulforaphane	C016766		1	1
XAF1	Tetradecanoylphorbol Acetate	D013755	16561-29-8	1	1
XAF1	Thioacetamide	D013853	62-55-5	1	1
XAF1	titanium dioxide	C009495	13463-67-7	1	1
XAF1	tributyltin	C011559	688-73-3	1	1
XAF1	triptonide	C084079	38647-11-9	1	1
XAF1	Urethane	D014520	51-79-6	1	1
XAF1	Vanadates	D014638		1	1
XAF1	vanadyl sulfate	C034028	27774-13-6	1	1

## Sheet: Sheet2
Key Gene	Chemical Name	Chemical ID	Interaction Count
IFIT3	Tretinoin	D014212	12
IFIT3	Tetrachlorodibenzodioxin	D013749	9
IFIT3	Lipopolysaccharides	D008070	8
IFIT3	Benzo(a)pyrene	D001564	7
IFIT3	Acetaminophen	D000082	6
IFIT3	Estradiol	D004958	6
IFIT3	Nanotubes, Carbon	D037742	4
IFIT3	Valproic Acid	D014635	4
IFIT3	1,2-Dimethylhydrazine	D019813	3
IFIT3	bisphenol A	C006780	3
IFIT3	Copper	D003300	3
IFIT3	Dietary Fats	D004041	3
IFIT3	(+)-JQ1 compound	C561695	3
IFIT3	Progesterone	D011374	3
IFIT3	trichostatin A	C012589	3
IFIT3	2,2',4,4'-tetrabromodiphenyl ether	C511295	2
IFIT3	4-(5-benzo(1,3)dioxol-5-yl-4-pyridin-2-yl-1H-imidazol-2-yl)benzamide	C459179	2
IFIT3	Asbestos, Serpentine	D017632	2
IFIT3	Benzene	D001554	2
IFIT3	bis(4-hydroxyphenyl)sulfone	C543008	2
IFIT3	BIX 01294	C518299	2
IFIT3	Cadmium Chloride	D019256	2
IFIT3	Cisplatin	D002945	2
IFIT3	Clofibrate	D002994	2
IFIT3	Cyclosporine	D016572	2
IFIT3	dorsomorphin	C516138	2
IFIT3	Doxorubicin	D004317	2
IFIT3	ethylene dichloride	C024565	2
IFIT3	Folic Acid	D005492	2
IFIT3	Formaldehyde	D005557	2
IFIT3	Hydroxychloroquine	D006886	2
IFIT3	Nickel	D009532	2
IFIT3	NSC 689534	C558013	2
IFIT3	Oxaliplatin	D000077150	2
IFIT3	Phenylmercuric Acetate	D010662	2
IFIT3	pirinixic acid	C006253	2
IFIT3	Plant Extracts	D010936	2
IFIT3	polyhexamethyleneguanidine	C060540	2
IFIT3	potassium chromate(VI)	C027373	2
IFIT3	Silicon Dioxide	D012822	2
IFIT3	Tamoxifen	D013629	2
IFIT3	tert-Butylhydroperoxide	D020122	2
IFIT3	titanium dioxide	C009495	2
IFIT3	Tobacco Smoke Pollution	D014028	2
IFIT3	Topotecan	D019772	2
IFIT3	Trichloroethylene	D014241	2
IFIT3	Zinc	D015032	2
IFIT3	1,2-dioleoyloxy-3-(trimethylammonium)propane	C070046	1
IFIT3	2-bromopalmitate	C022776	1
IFIT3	2-xylene	C026114	1
IFIT3	4-(4-((5-(4,5-dimethyl-2-nitrophenyl)-2-furanyl)methylene)-4,5-dihydro-3-methyl-5-oxo-1H-pyrazol-1-yl)benzoic acid	C584509	1
IFIT3	4-hydroxy-2-nonenal	C027576	1
IFIT3	7,8-Dihydro-7,8-dihydroxybenzo(a)pyrene 9,10-oxide	D015123	1
IFIT3	abrine	C496492	1
IFIT3	acetamide	C030686	1
IFIT3	Aconitine	D000157	1
IFIT3	Aflatoxin B1	D016604	1
IFIT3	afuresertib	C000593263	1
IFIT3	Amphetamine	D000661	1
IFIT3	Arbutin	D001104	1
IFIT3	Arsenic Trioxide	D000077237	1
IFIT3	Astemizole	D016589	1
IFIT3	Atrazine	D001280	1
IFIT3	avobenzone	C049935	1
IFIT3	Azathioprine	D001379	1
IFIT3	belinostat	C487081	1
IFIT3	benz(a)anthracene	C030935	1
IFIT3	beta-Naphthoflavone	D019324	1
IFIT3	butyraldehyde	C018475	1
IFIT3	Butyrates	D002087	1
IFIT3	Calcitriol	D002117	1
IFIT3	chlorophyllin	C007020	1
IFIT3	Cholesterol	D002784	1
IFIT3	Clioquinol	D007464	1
IFIT3	Dasatinib	D000069439	1
IFIT3	Demecolcine	D003703	1
IFIT3	Dichloroacetic Acid	D003999	1
IFIT3	Diclofenac	D004008	1
IFIT3	Dieldrin	D004026	1
IFIT3	diethyl maleate	C014476	1
IFIT3	Diethylstilbestrol	D004054	1
IFIT3	dimethylarsinous acid	C472511	1
IFIT3	Disulfiram	D004221	1
IFIT3	Dronabinol	D013759	1
IFIT3	Endosulfan	D004726	1
IFIT3	epigallocatechin gallate	C045651	1
IFIT3	estradiol 3-benzoate	C074283	1
IFIT3	ethylbenzene	C004912	1
IFIT3	Ethylenethiourea	D005031	1
IFIT3	Ethyl Methanesulfonate	D005020	1
IFIT3	Fenretinide	D017313	1
IFIT3	Flutamide	D005485	1
IFIT3	gadodiamide	C064925	1
IFIT3	genipin	C007834	1
IFIT3	Genistein	D019833	1
IFIT3	Gentamicins	D005839	1
IFIT3	Glucosamine	D005944	1
IFIT3	Gold Sodium Thiomalate	D006052	1
IFIT3	hexamethylene bisacetamide	C014026	1
IFIT3	hydroquinone	C031927	1
IFIT3	ICG 001	C492448	1
IFIT3	Ionomycin	D015759	1
IFIT3	jinfukang	C544151	1
IFIT3	lipopolysaccharide, E coli O55-B5	C482199	1
IFIT3	Magnetite Nanoparticles	D058185	1
IFIT3	Methamphetamine	D008694	1
IFIT3	Methotrexate	D008727	1
IFIT3	Methylcholanthrene	D008748	1
IFIT3	methyldithiocarbamate	C008435	1
IFIT3	Methylene Chloride	D008752	1
IFIT3	methylmercuric chloride	C004925	1
IFIT3	Methylprednisolone	D008775	1
IFIT3	Mustard Gas	D009151	1
IFIT3	N4-(2,2-dimethyl-3-oxo-4H-pyrid(1,4)oxazin-6-yl)-5-fluoro-N2-(3,4,5-trimethoxyphenyl)-2,4-pyrimidinediamine	C510788	1
IFIT3	Oxazolone	D010081	1
IFIT3	Ozone	D010126	1
IFIT3	Particulate Matter	D052638	1
IFIT3	pentabromodiphenyl ether	C086401	1
IFIT3	Pentachlorophenol	D010416	1
IFIT3	Phenobarbital	D010634	1
IFIT3	Polychlorinated Biphenyls	D011078	1
IFIT3	Povidone	D011205	1
IFIT3	Prednisolone	D011239	1
IFIT3	propiconazole	C045950	1
IFIT3	Resveratrol	D000077185	1
IFIT3	Silver	D012834	1
IFIT3	Soman	D012999	1
IFIT3	Succimer	D004113	1
IFIT3	sulforaphane	C016766	1
IFIT3	systhane	C446685	1
IFIT3	tamibarotene	C061133	1
IFIT3	Temozolomide	D000077204	1
IFIT3	Testosterone	D013739	1
IFIT3	testosterone enanthate	C004648	1
IFIT3	tetrabromobisphenol A	C020806	1
IFIT3	Tetradecanoylphorbol Acetate	D013755	1
IFIT3	Thiophenes	D013876	1
IFIT3	tofacitinib	C479163	1
IFIT3	Toluene	D014050	1
IFIT3	tributyltin	C011559	1
IFIT3	Triclosan	D014260	1
IFIT3	triptolide	C001899	1
IFIT3	UNC 0638	C561310	1
IFIT3	Vancomycin	D014640	1
IFIT3	Vehicle Emissions	D001335	1
IFIT3	Vitamin K 3	D024483	1
MX1	Benzo(a)pyrene	D001564	9
MX1	(+)-JQ1 compound	C561695	9
MX1	Lipopolysaccharides	D008070	8
MX1	Poly I-C	D011070	8
MX1	Silicon Dioxide	D012822	5
MX1	bisphenol A	C006780	4
MX1	Cyclosporine	D016572	4
MX1	Estradiol	D004958	4
MX1	Nickel	D009532	4
MX1	Tetrachlorodibenzodioxin	D013749	4
MX1	2,2',4,4'-tetrabromodiphenyl ether	C511295	3
MX1	Acetaminophen	D000082	3
MX1	Decitabine	D000077209	3
MX1	Dieldrin	D004026	3
MX1	Nanotubes, Carbon	D037742	3
MX1	Ozone	D010126	3
MX1	potassium chromate(VI)	C027373	3
MX1	tert-Butylhydroperoxide	D020122	3
MX1	3,4,5,3',4'-pentachlorobiphenyl	C023035	2
MX1	Acrolein	D000171	2
MX1	alpha-pinene	C005451	2
MX1	alvocidib	C077990	2
MX1	Antigens, Bacterial	D000942	2
MX1	Asbestos, Serpentine	D017632	2
MX1	Benzene	D001554	2
MX1	Cadmium Chloride	D019256	2
MX1	Chlorpyrifos	D004390	2
MX1	Copper	D003300	2
MX1	Diethylhexyl Phthalate	D004051	2
MX1	Doxorubicin	D004317	2
MX1	epigallocatechin gallate	C045651	2
MX1	Ethinyl Estradiol	D004997	2
MX1	Genistein	D019833	2
MX1	methacrylaldehyde	C039175	2
MX1	Ovalbumin	D010047	2
MX1	Oxaliplatin	D000077150	2
MX1	Paraquat	D010269	2
MX1	Plant Extracts	D010936	2
MX1	sodium arsenite	C017947	2
MX1	Testosterone	D013739	2
MX1	Tetradecanoylphorbol Acetate	D013755	2
MX1	titanium dioxide	C009495	2
MX1	Tobacco Smoke Pollution	D014028	2
MX1	Topotecan	D019772	2
MX1	Triclosan	D014260	2
MX1	Valproic Acid	D014635	2
MX1	2,3,7,8-tetrachlorodibenzofuran	C014211	1
MX1	2,4,5,2',4',5'-hexachlorobiphenyl	C014024	1
MX1	4-(4-((5-(4,5-dimethyl-2-nitrophenyl)-2-furanyl)methylene)-4,5-dihydro-3-methyl-5-oxo-1H-pyrazol-1-yl)benzoic acid	C584509	1
MX1	4,4'-diaminodiphenylmethane	C009505	1
MX1	4-hydroxy-2-nonenal	C027576	1
MX1	7,7'-dimethoxy-(4,4'-bi-1,3-benzodioxole)-5,5'-dicarboxylic acid dimethyl ester	C041398	1
MX1	abrine	C496492	1
MX1	acetamide	C030686	1
MX1	Acetylcysteine	D000111	1
MX1	Acrylamide	D020106	1
MX1	actein	C096064	1
MX1	Air Pollutants	D000393	1
MX1	Ammonium Chloride	D000643	1
MX1	Amphetamine	D000661	1
MX1	Arsenic	D001151	1
MX1	Arsenic Trioxide	D000077237	1
MX1	Asbestos, Crocidolite	D017638	1
MX1	Aspirin	D001241	1
MX1	Azathioprine	D001379	1
MX1	bromobenzene	C032036	1
MX1	Cadmium	D002104	1
MX1	Carbon Tetrachloride	D002251	1
MX1	chlorophyllin	C007020	1
MX1	chromium hexavalent ion	C074702	1
MX1	cinnamaldehyde	C012843	1
MX1	Cisplatin	D002945	1
MX1	Cuprizone	D003471	1
MX1	decabromobiphenyl ether	C010902	1
MX1	Dichloroacetic Acid	D003999	1
MX1	Dichlororibofuranosylbenzimidazole	D004004	1
MX1	Diclofenac	D004008	1
MX1	Dietary Fats	D004041	1
MX1	diethyl maleate	C014476	1
MX1	dimethylarsinous acid	C472511	1
MX1	Disulfiram	D004221	1
MX1	Endosulfan	D004726	1
MX1	estradiol 3-benzoate	C074283	1
MX1	fenvalerate	C017690	1
MX1	Folic Acid	D005492	1
MX1	Formaldehyde	D005557	1
MX1	Fulvestrant	D000077267	1
MX1	genipin	C007834	1
MX1	Gentamicins	D005839	1
MX1	Gold Sodium Thiomalate	D006052	1
MX1	GW 4064	C412815	1
MX1	hexabrominated diphenyl ether 153	C517828	1
MX1	hydroquinone	C031927	1
MX1	ICG 001	C492448	1
MX1	Ionomycin	D015759	1
MX1	Iopamidol	D007479	1
MX1	Lactic Acid	D019344	1
MX1	Latex	D007840	1
MX1	lipopolysaccharide, E coli O55-B5	C482199	1
MX1	Lucanthone	D008154	1
MX1	Methamphetamine	D008694	1
MX1	Methotrexate	D008727	1
MX1	methyldithiocarbamate	C008435	1
MX1	Methylprednisolone	D008775	1
MX1	Mitomycin	D016685	1
MX1	monomethylarsonic acid	C020300	1
MX1	Mustard Gas	D009151	1
MX1	N4-(2,2-dimethyl-3-oxo-4H-pyrid(1,4)oxazin-6-yl)-5-fluoro-N2-(3,4,5-trimethoxyphenyl)-2,4-pyrimidinediamine	C510788	1
MX1	nickel sulfate	C029938	1
MX1	pentabromodiphenyl ether	C086401	1
MX1	Pentachlorophenol	D010416	1
MX1	pentanal	C046012	1
MX1	perfluorooctanoic acid	C023036	1
MX1	perfluoroundecanoic acid	C586085	1
MX1	Perfume	D010476	1
MX1	Piroxicam	D010894	1
MX1	Prednisolone	D011239	1
MX1	Progesterone	D011374	1
MX1	Propylthiouracil	D011441	1
MX1	Protein Kinase Inhibitors	D047428	1
MX1	S-1,2-dichlorovinyl-N-acetylcysteine	C049705	1
MX1	Selenium	D012643	1
MX1	Silver	D012834	1
MX1	Smoke	D012906	1
MX1	Soman	D012999	1
MX1	sulindac sulfide	C025462	1
MX1	Tamoxifen	D013629	1
MX1	Temozolomide	D000077204	1
MX1	testosterone enanthate	C004648	1
MX1	Tetrachloroethylene	D013750	1
MX1	tofacitinib	C479163	1
MX1	tremolite	C005846	1
MX1	Tretinoin	D014212	1
MX1	Trichloroethylene	D014241	1
MX1	trichostatin A	C012589	1
MX1	triptolide	C001899	1
MX1	UNC 0638	C561310	1
MX1	Vehicle Emissions	D001335	1
MX1	Vitamin E	D014810	1
MX1	Volatile Organic Compounds	D055549	1
MX1	Vorinostat	D000077337	1
MX1	Zidovudine	D015215	1
RSAD2	Tetrachlorodibenzodioxin	D013749	8
RSAD2	Benzo(a)pyrene	D001564	6
RSAD2	bisphenol A	C006780	4
RSAD2	Carbon Tetrachloride	D002251	4
RSAD2	Lipopolysaccharides	D008070	4
RSAD2	Nanotubes, Carbon	D037742	4
RSAD2	Cannabidiol	D002185	3
RSAD2	lipopolysaccharide, E coli O55-B5	C482199	3
RSAD2	Magnetite Nanoparticles	D058185	3
RSAD2	Phenobarbital	D010634	3
RSAD2	Silicon Dioxide	D012822	3
RSAD2	sodium arsenite	C017947	3
RSAD2	Succimer	D004113	3
RSAD2	Tamoxifen	D013629	3
RSAD2	tert-Butylhydroperoxide	D020122	3
RSAD2	2,2',4,4'-tetrabromodiphenyl ether	C511295	2
RSAD2	3,4,5,3',4'-pentachlorobiphenyl	C023035	2
RSAD2	4-nonylphenol	C041594	2
RSAD2	Acetaminophen	D000082	2
RSAD2	Cyclosporine	D016572	2
RSAD2	Dibutyl Phthalate	D003993	2
RSAD2	Dietary Fats	D004041	2
RSAD2	Diethylhexyl Phthalate	D004051	2
RSAD2	Doxorubicin	D004317	2
RSAD2	Dronabinol	D013759	2
RSAD2	Formaldehyde	D005557	2
RSAD2	Gentamicins	D005839	2
RSAD2	GSK3235025	C000599896	2
RSAD2	Hydroxychloroquine	D006886	2
RSAD2	Meloxicam	D000077239	2
RSAD2	Methotrexate	D008727	2
RSAD2	monomethylarsonous acid	C406082	2
RSAD2	Nickel	D009532	2
RSAD2	pirinixic acid	C006253	2
RSAD2	propiconazole	C045950	2
RSAD2	Tobacco Smoke Pollution	D014028	2
RSAD2	Tretinoin	D014212	2
RSAD2	Triclosan	D014260	2
RSAD2	1,12-benzoperylene	C006718	1
RSAD2	1,2-Dimethylhydrazine	D019813	1
RSAD2	1-Methyl-4-phenylpyridinium	D015655	1
RSAD2	2,4,5,2',4',5'-hexachlorobiphenyl	C014024	1
RSAD2	2,4-diaminotoluene	C010914	1
RSAD2	2,6-dinitrotoluene	C023514	1
RSAD2	2-Acetylaminofluorene	D015073	1
RSAD2	2-nitrofluorene	C019499	1
RSAD2	4-hydroxy-2-nonenal	C027576	1
RSAD2	abrine	C496492	1
RSAD2	acetamide	C030686	1
RSAD2	Acrylamide	D020106	1
RSAD2	alpha phellandrene	C005403	1
RSAD2	Aluminum	D000535	1
RSAD2	Ammonium Chloride	D000643	1
RSAD2	Antigens, Polyomavirus Transforming	D000952	1
RSAD2	Arsenic	D001151	1
RSAD2	arsenite	C015001	1
RSAD2	Asbestos, Serpentine	D017632	1
RSAD2	Atrazine	D001280	1
RSAD2	avobenzone	C049935	1
RSAD2	Azathioprine	D001379	1
RSAD2	AZM551248	C547126	1
RSAD2	benazepril	C044946	1
RSAD2	benz(a)anthracene	C030935	1
RSAD2	bis(4-hydroxyphenyl)sulfone	C543008	1
RSAD2	Cacodylic Acid	D002101	1
RSAD2	Cadmium Chloride	D019256	1
RSAD2	Calcitriol	D002117	1
RSAD2	Chlordecone	D007631	1
RSAD2	Chloroprene	D002737	1
RSAD2	chloroquine diphosphate	C023676	1
RSAD2	Cholecalciferol	D002762	1
RSAD2	chromium hexavalent ion	C074702	1
RSAD2	Cisplatin	D002945	1
RSAD2	cobaltous chloride	C018021	1
RSAD2	Copper	D003300	1
RSAD2	Cuprizone	D003471	1
RSAD2	cyproconazole	C093628	1
RSAD2	DDT	D003634	1
RSAD2	Dichloroacetic Acid	D003999	1
RSAD2	Diclofenac	D004008	1
RSAD2	dicyclohexyl phthalate	C036042	1
RSAD2	diethyl maleate	C014476	1
RSAD2	dimethyl phthalate	C024629	1
RSAD2	Disulfiram	D004221	1
RSAD2	Endosulfan	D004726	1
RSAD2	epoxiconazole	C109476	1
RSAD2	Estradiol	D004958	1
RSAD2	Ethinyl Estradiol	D004997	1
RSAD2	ethylene dichloride	C024565	1
RSAD2	Folic Acid	D005492	1
RSAD2	gadodiamide	C064925	1
RSAD2	genipin	C007834	1
RSAD2	glycidol	C004312	1
RSAD2	glyphosate	C010974	1
RSAD2	Gold Sodium Thiomalate	D006052	1
RSAD2	GW 4064	C412815	1
RSAD2	Hexachlorocyclohexane	D001556	1
RSAD2	Iohexol	D007472	1
RSAD2	Ionomycin	D015759	1
RSAD2	Iopamidol	D007479	1
RSAD2	(+)-JQ1 compound	C561695	1
RSAD2	Lactic Acid	D019344	1
RSAD2	manganese chloride	C025340	1
RSAD2	Mercuric Chloride	D008627	1
RSAD2	Mercury	D008628	1
RSAD2	Methylcholanthrene	D008748	1
RSAD2	Methylprednisolone	D008775	1
RSAD2	monomethyl phthalate	C517284	1
RSAD2	N4-(2,2-dimethyl-3-oxo-4H-pyrid(1,4)oxazin-6-yl)-5-fluoro-N2-(3,4,5-trimethoxyphenyl)-2,4-pyrimidinediamine	C510788	1
RSAD2	nitrofen	C007350	1
RSAD2	ochratoxin A	C025589	1
RSAD2	PAM2-CSK4	C000711848	1
RSAD2	Particulate Matter	D052638	1
RSAD2	Pentachlorophenol	D010416	1
RSAD2	perfluorooctanoic acid	C023036	1
RSAD2	Piroxicam	D010894	1
RSAD2	Polychlorinated Biphenyls	D011078	1
RSAD2	Prednisolone	D011239	1
RSAD2	Progesterone	D011374	1
RSAD2	Propylthiouracil	D011441	1
RSAD2	Quercetin	D011794	1
RSAD2	Rapeseed Oil	D000074262	1
RSAD2	Resveratrol	D000077185	1
RSAD2	Rotenone	D012402	1
RSAD2	Silver	D012834	1
RSAD2	sodium bichromate	C016104	1
RSAD2	systhane	C446685	1
RSAD2	Temozolomide	D000077204	1
RSAD2	testosterone enanthate	C004648	1
RSAD2	tetrabromobisphenol A	C020806	1
RSAD2	Tetradecanoylphorbol Acetate	D013755	1
RSAD2	titanium dioxide	C009495	1
RSAD2	tofacitinib	C479163	1
RSAD2	Toxins, Biological	D014118	1
RSAD2	tremolite	C005846	1
RSAD2	tributyltin	C011559	1
RSAD2	Trichloroethylene	D014241	1
RSAD2	Trinitrotoluene	D014303	1
RSAD2	triphenyl phosphate	C005445	1
RSAD2	Tungsten	D014414	1
RSAD2	Tunicamycin	D014415	1
RSAD2	urushiol	C003747	1
RSAD2	Valproic Acid	D014635	1
RSAD2	Zidovudine	D015215	1
XAF1	Decitabine	D000077209	7
XAF1	Azacitidine	D001374	6
XAF1	glyphosate	C010974	6
XAF1	Temozolomide	D000077204	6
XAF1	Tretinoin	D014212	5
XAF1	Nanotubes, Carbon	D037742	4
XAF1	Acetaminophen	D000082	3
XAF1	Benzo(a)pyrene	D001564	3
XAF1	Cyclosporine	D016572	3
XAF1	Fluorouracil	D005472	3
XAF1	Tobacco Smoke Pollution	D014028	3
XAF1	2,2',4,4'-tetrabromodiphenyl ether	C511295	2
XAF1	Atrazine	D001280	2
XAF1	bis(4-hydroxyphenyl)sulfone	C543008	2
XAF1	bisphenol A	C006780	2
XAF1	Cisplatin	D002945	2
XAF1	Curcumin	D003474	2
XAF1	Etoposide	D005047	2
XAF1	(+)-JQ1 compound	C561695	2
XAF1	Magnetite Nanoparticles	D058185	2
XAF1	Methotrexate	D008727	2
XAF1	monomethylarsonous acid	C406082	2
XAF1	Nickel	D009532	2
XAF1	ochratoxin A	C025589	2
XAF1	sodium arsenite	C017947	2
XAF1	Succimer	D004113	2
XAF1	Vehicle Emissions	D001335	2
XAF1	1,2-Dimethylhydrazine	D019813	1
XAF1	3,4,5,3',4'-pentachlorobiphenyl	C023035	1
XAF1	4-hydroxy-2-nonenal	C027576	1
XAF1	Aflatoxin B1	D016604	1
XAF1	alpha phellandrene	C005403	1
XAF1	Arsenic Trioxide	D000077237	1
XAF1	arsenite	C015001	1
XAF1	avobenzone	C049935	1
XAF1	benz(a)anthracene	C030935	1
XAF1	Bortezomib	D000069286	1
XAF1	butylparaben	C038091	1
XAF1	butyraldehyde	C018475	1
XAF1	Cannabidiol	D002185	1
XAF1	Carbon Tetrachloride	D002251	1
XAF1	Chlordecone	D007631	1
XAF1	Cyclophosphamide	D003520	1
XAF1	decabromobiphenyl ether	C010902	1
XAF1	dimethylarsinous acid	C472511	1
XAF1	Dronabinol	D013759	1
XAF1	Drugs, Chinese Herbal	D004365	1
XAF1	Endosulfan	D004726	1
XAF1	epigallocatechin gallate	C045651	1
XAF1	Estradiol	D004958	1
XAF1	ethylene dichloride	C024565	1
XAF1	Ethyl Methanesulfonate	D005020	1
XAF1	Folic Acid	D005492	1
XAF1	Formaldehyde	D005557	1
XAF1	Gentamicins	D005839	1
XAF1	Hydrogen Peroxide	D006861	1
XAF1	hydroquinone	C031927	1
XAF1	Ionomycin	D015759	1
XAF1	lead acetate	C008261	1
XAF1	Methyl Methanesulfonate	D008741	1
XAF1	Naphthoquinones	D009285	1
XAF1	nickel sulfate	C029938	1
XAF1	N-nitroso-tris-chloroethylurea	C572573	1
XAF1	Pentachlorophenol	D010416	1
XAF1	Pentosan Sulfuric Polyester	D010426	1
XAF1	perfluoro-n-nonanoic acid	C101816	1
XAF1	perfluorooctane sulfonic acid	C076994	1
XAF1	Phenobarbital	D010634	1
XAF1	Plant Extracts	D010936	1
XAF1	Progesterone	D011374	1
XAF1	pyrazolanthrone	C432165	1
XAF1	Silver	D012834	1
XAF1	Silver Compounds	D018030	1
XAF1	Sodium Selenite	D018038	1
XAF1	sulforaphane	C016766	1
XAF1	Tetradecanoylphorbol Acetate	D013755	1
XAF1	Thioacetamide	D013853	1
XAF1	titanium dioxide	C009495	1
XAF1	tributyltin	C011559	1
XAF1	triptonide	C084079	1
XAF1	Urethane	D014520	1
XAF1	Vanadates	D014638	1
XAF1	vanadyl sulfate	C034028	1
