# Supplementary material for: Identification and analysis of mitochondria-related key genes of heart failure
Source: J Transl Med. 2022 Sep 7;20:410. doi: 10.1186/s12967-022-03605-2 (PMC9450345; doi:10.1186/s12967-022-03605-2)
Supplement: Supplementary file 7 — Additional file 7: Table S7. Upregulated miRNA dataset. [file 12967_2022_3605_MOESM7_ESM.xls]

mir	logFC	AveExpr	t	P.Value	adj.P.Val	B
hsa-miR-29c-3p	0.948437500000007	6.67625	6.43662495865174	7.55671642708777e-09	9.46856568314097e-06	9.97168726393993
hsa-miR-18b-5p	1.49041666666667	3.258625	5.93271926306534	6.69737679155975e-08	4.19590655991218e-05	7.93503453767369
hsa-miR-29b-3p	0.863437499999999	4.724625	5.77195647443886	1.32621736281775e-07	6.64700142244258e-05	7.29780477315424
hsa-miR-210-3p	0.74229166666667	6.926	5.64723995362187	2.24228314707113e-07	8.02737366651466e-05	6.80822978104252
hsa-miR-17-3p	1.36239583333334	3.845875	5.17069343527145	1.59682704993261e-06	0.000400164858713111	4.9809073021765
hsa-miR-18a-5p	1.6353125	3.349625	5.10880137660906	2.04918071201557e-06	0.000441615257084608	4.7491414141736
hsa-miR-106b-5p	0.812395833333337	9.5065	4.90389813086304	4.6330106998618e-06	0.000829308915275263	3.99194615382083
hsa-miR-301a-3p	0.950937499999999	2.404625	4.46623519971594	2.50231947175146e-05	0.00313540629810458	2.43155048525356
hsa-miR-590-5p	0.898229166666668	2.987375	4.4284892069846	2.88300706359264e-05	0.00344038842922054	2.30092042510186
hsa-miR-7-5p	0.909479166666667	4.45475	4.33815789262344	4.03541640159196e-05	0.00433146583275219	1.9910190994456
hsa-miR-148a-3p	0.986666666666668	5.037	4.33070484506004	4.14825139609148e-05	0.00433146583275219	1.96562337222959
hsa-miR-101-3p	1.4478125	3.895875	4.19227256478803	6.89047741755078e-05	0.0069070145633529	1.49886164016243
hsa-miR-378f	0.503854166666667	1.5895	4.00579553702211	0.000134494724058784	0.0118219581917483	0.885450202606121
hsa-miR-140-5p	0.883645833333333	3.298625	3.86016869935584	0.000223965466950945	0.0159096860806748	0.419273538843778
hsa-miR-21-3p	0.503229166666668	2.056	3.80096282754262	0.000274684401834209	0.0164758936976422	0.233097425685235
hsa-miR-144-5p	1.7071875	5.13275	3.79256901235381	0.000282706875099208	0.0164758936976422	0.206862714269295
hsa-miR-103a-3p	0.755520833333332	10.179875	3.77002529670805	0.000305374373970426	0.017005959581553	0.136601239863035
hsa-miR-19a-3p	0.800312500000003	6.93175	3.73729198727026	0.000341393147846402	0.0177076106701437	0.0351001348775375
hsa-miR-20a-5p	1.19083333333334	7.532625	3.72153034123002	0.000360147125331383	0.0180505739216089	-0.01355407176555
hsa-miR-107	0.767499999999998	10.462375	3.66874348011875	0.000430356475051669	0.0203485533298016	-0.175447634347616
hsa-miR-96-5p	1.23427083333334	4.56275	3.52644789693456	0.000690150807010688	0.0271996994416122	-0.603623724833896
hsa-miR-144-3p	1.659375	4.6675	3.47946131039934	0.000804575733258353	0.030373739008437	-0.742313087908754
hsa-miR-17-5p	0.98697916666667	7.56125	3.38560307928867	0.00108884950757715	0.0342747944735751	-1.0152445103877
hsa-let-7i-5p	0.909479166666662	9.806	3.38318757564708	0.00109728550022677	0.0342747944735751	-1.02219542206474
hsa-let-7f-5p	0.717708333333334	9.975625	3.35901113483695	0.0011851784077717	0.0349418481161869	-1.09156180895899
hsa-let-7g-5p	0.947083333333335	9.16325	3.34137608284792	0.00125342252483504	0.0352929982835575	-1.14192460901161
hsa-miR-20b-5p	0.937708333333338	6.661375	3.14996047096928	0.00227357167781134	0.0487634280494259	-1.67556289248049
hsa-miR-98-5p	0.608750000000001	3.58775	3.12652656625045	0.00244169600222361	0.0509907515131031	-1.73922481643187
hsa-miR-15a-5p	1.02406250000001	8.2785	3.11196185165056	0.00255195253561728	0.0528528351591479	-1.77860544152564
hsa-miR-454-3p	0.8284375	3.7855	3.07954670412979	0.002814185290735	0.0555303018785978	-1.86573410299986
hsa-let-7a-5p	0.563854166666664	11.334875	2.99752426365095	0.00359371810535237	0.0652598374783554	-2.0829861501395
hsa-miR-374a-5p	0.837395833333335	3.44775	2.91707016024313	0.00454855192443472	0.0754878882293604	-2.29153919460189
hsa-miR-93-5p	0.810416666666668	7.8925	2.80996733717085	0.00618351404001769	0.0856126308523996	-2.56204717893915
hsa-miR-660-5p	0.5871875	5.208875	2.79964759010621	0.00636664548599225	0.0876638109225087	-2.58767575020069
hsa-miR-195-5p	0.606354166666667	3.317875	2.44965852771398	0.0164114608289916	0.149553166681647	-3.41002311511424
hsa-miR-16-5p	0.705312500000009	12.194125	2.44459422294445	0.016627503462406	0.1499308416191	-3.42123850312579
hsa-miR-26b-5p	0.725729166666672	6.7045	2.22600920167445	0.0287357256307758	0.201970226337849	-3.88605457176124
hsa-miR-126-3p	1.02916666666667	5.10375	2.2000624833192	0.0305938950032406	0.210039580605557	-3.93869336454826
hsa-miR-21-5p	0.654687500000001	7.156875	2.13675000737604	0.0355748789052792	0.230363427743229	-4.06483877395793
